# Supplementary material for: Looking for Novel Natural Gels to Improve Cleaning Methods for Bronze Leachates on Marble
Source: MDPI journal article supplement (doi:10.3390/gels9110843), 2023-10-25
Supplement: s1 [file s1]

## Supplementary Materials

**Table S1.** Colour variation values  $\Delta E$  of each of the cleanings. Coloured in green are values greater than 5, indicating an easily noticeable change in colour.

|     | First Cleaning     | Second Cleaning    | Total Cleaning     |
|-----|--------------------|--------------------|--------------------|
|     | $\Delta E$ (T2-T1) | $\Delta E$ (T3-T2) | $\Delta E$ (T3-T1) |
| KJ1 | 8                  | 2                  | 6                  |
| KJ2 | 16                 | 6                  | 22                 |
| KJ3 | 14                 | 9                  | 22                 |
| KJ4 | 4                  | 5                  | 6                  |
| KJ5 | 3                  | 5                  | 3                  |
| KD1 | 3                  | 1                  | 2                  |
| KD2 | 12                 | 11                 | 22                 |
| KD3 | 13                 | 9                  | 21                 |
| KD4 | 5                  | 2                  | 6                  |
| KD5 | 3                  | 17                 | 20                 |
| AG1 | 3                  | 3                  | 5                  |
| AG2 | 16                 | 5                  | 21                 |
| AG3 | 15                 | 5                  | 20                 |
| AG4 | 8                  | 4                  | 12                 |
| AG5 | 9                  | 14                 | 22                 |

**Table S2.** Data from colorimetric analysis obtained during cleaning of the application after drying.

|     | T0    |       |       | T1    |        |        | T2    |        |        | (T2-T1)    |
|-----|-------|-------|-------|-------|--------|--------|-------|--------|--------|------------|
|     | L     | a*    | b*    | L     | a*     | b*     | L     | a*     | b*     | $\Delta E$ |
| KJ1 | 71.51 | -1.31 | -2.7  | 54.4  | -45.63 | -15.2  | 64.99 | -15.44 | -9.47  | 32.50      |
| KJ2 | 71.73 | -1.4  | -2.92 | 53.68 | -45.27 | -14.84 | 61.12 | -2.27  | -2.56  | 45.33      |
| KJ3 | 71    | -1.36 | -2.82 | 53.38 | -48.9  | -14.86 | 63.22 | -3.93  | -3.44  | 47.43      |
| KJ4 | 71.6  | -1.3  | -2.6  | 54.98 | -36.59 | -14.94 | 69.42 | -3.94  | -4.24  | 37.27      |
| KJ5 | 72.43 | -1.36 | -2.73 | 54.05 | -43.24 | -15.09 | 56    | -4.17  | -3.47  | 40.81      |
| KD1 | 70.36 | -1.3  | -2.42 | 54.14 | -40.92 | -15.39 | 54.76 | -39.42 | -15.3  | 1.63       |
| KD2 | 73.33 | -1.31 | -2.63 | 55.05 | -41.65 | -14.82 | 64.04 | -3.08  | -2.71  | 41.41      |
| KD3 | 71.04 | -1.33 | -2.64 | 55.5  | -31.92 | -14.67 | 64.36 | -4.24  | -3.85  | 31.01      |
| KD4 | 69.08 | -1.31 | -2.76 | 54.44 | -47.6  | -15.65 | 68.92 | -28.92 | -17.01 | 23.67      |
| KD5 | 70.65 | -1.35 | -2.88 | 54.2  | -39.33 | -14.99 | 54.08 | -14.5  | -7.48  | 25.94      |
| AG1 | 70.75 | -1.32 | -2.75 | 54.54 | -40.08 | -14.97 | 54.73 | -39.86 | -14.71 | 0.39       |
| AG2 | 71.44 | -1.31 | -2.72 | 53.34 | -52.4  | -14.78 | 57.42 | -2.8   | -2.73  | 51.21      |
| AG3 | 71.31 | -1.27 | -2.52 | 54.29 | -39.26 | -14.92 | 56.89 | -11.49 | -6.53  | 29.13      |
| AG4 | 72.28 | -1.28 | -2.64 | 53.85 | -46.32 | -14.53 | 69.82 | -22.1  | -14.59 | 29.01      |
| AG5 | 76.68 | -1.01 | -2.12 | 53.33 | -44.11 | -14.75 | 49.93 | -26.07 | -13.63 | 18.39      |

**Table S3.** Data from XRF analysis obtained during cleaning of the application after drying. Difference in Cu counts between the stained mock-ups and after cleaning. ND: no difference.

|     | Difference in Cu Counts |
|-----|-------------------------|
| KJ1 | 2,890,264               |
| KJ2 | 4,083,784               |
| KJ3 | 4,718,721               |
| KJ4 | 3,673,585               |
| KJ5 | 4,535,227               |
| KD1 | ND                      |
| KD2 | 3,786,088               |
| KD3 | 2,151,944               |
| KD4 | 2,376,877               |
| KD5 | 2,146,642               |
| AG1 | ND                      |
| AG2 | 4,625,610               |
| AG3 | 3,984,632               |
| AG4 | 1,141,770               |
| AG5 | 2,081,537               |

**Table S4.** Data from ICP-MS analysis obtained during cleaning of the application after drying. Difference in Cu counts between the stained mock-ups and after cleaning. Copper and calcium extracted by each gel after its application.

|     | Cu ( $\mu\text{g}/\text{cm}^2$ ) | Ca ( $\mu\text{g}/\text{cm}^2$ ) |
|-----|----------------------------------|----------------------------------|
| KJ1 | 1813                             | 48                               |
| KJ2 | 2027                             | 29                               |
| KJ3 | 2609                             | 448                              |
| KJ4 | 2157                             | 78                               |
| KJ5 | 2512                             | 73                               |
| KD1 | 70                               | 13                               |
| KD2 | 2566                             | 49                               |
| KD3 | 1036                             | 689                              |
| KD4 | 488                              | 25                               |
| KD5 | 1151                             | 125                              |
| AG1 | 106                              | 47                               |
| AG2 | 2348                             | 53                               |
| AG3 | 2179                             | 1459                             |
| AG4 | 666                              | 77                               |
| AG5 | 1274                             | 77                               |
